# Supplementary material for: Molecular Epidemiology of Rhinovirus Detections in Young Children
Source: PubMed Central journal article supplement — Open Forum Infect Dis. 2016 Jan 13;3(1):ofw001. doi: 10.1093/ofid/ofw001 (PMC4759584; doi:10.1093/ofid/ofw001), 2016-01-13
Supplement: supp_ofw001_ofw001supp.pdf [file supp_ofw001_ofw001supp.pdf]

# Supplemental Figure 1

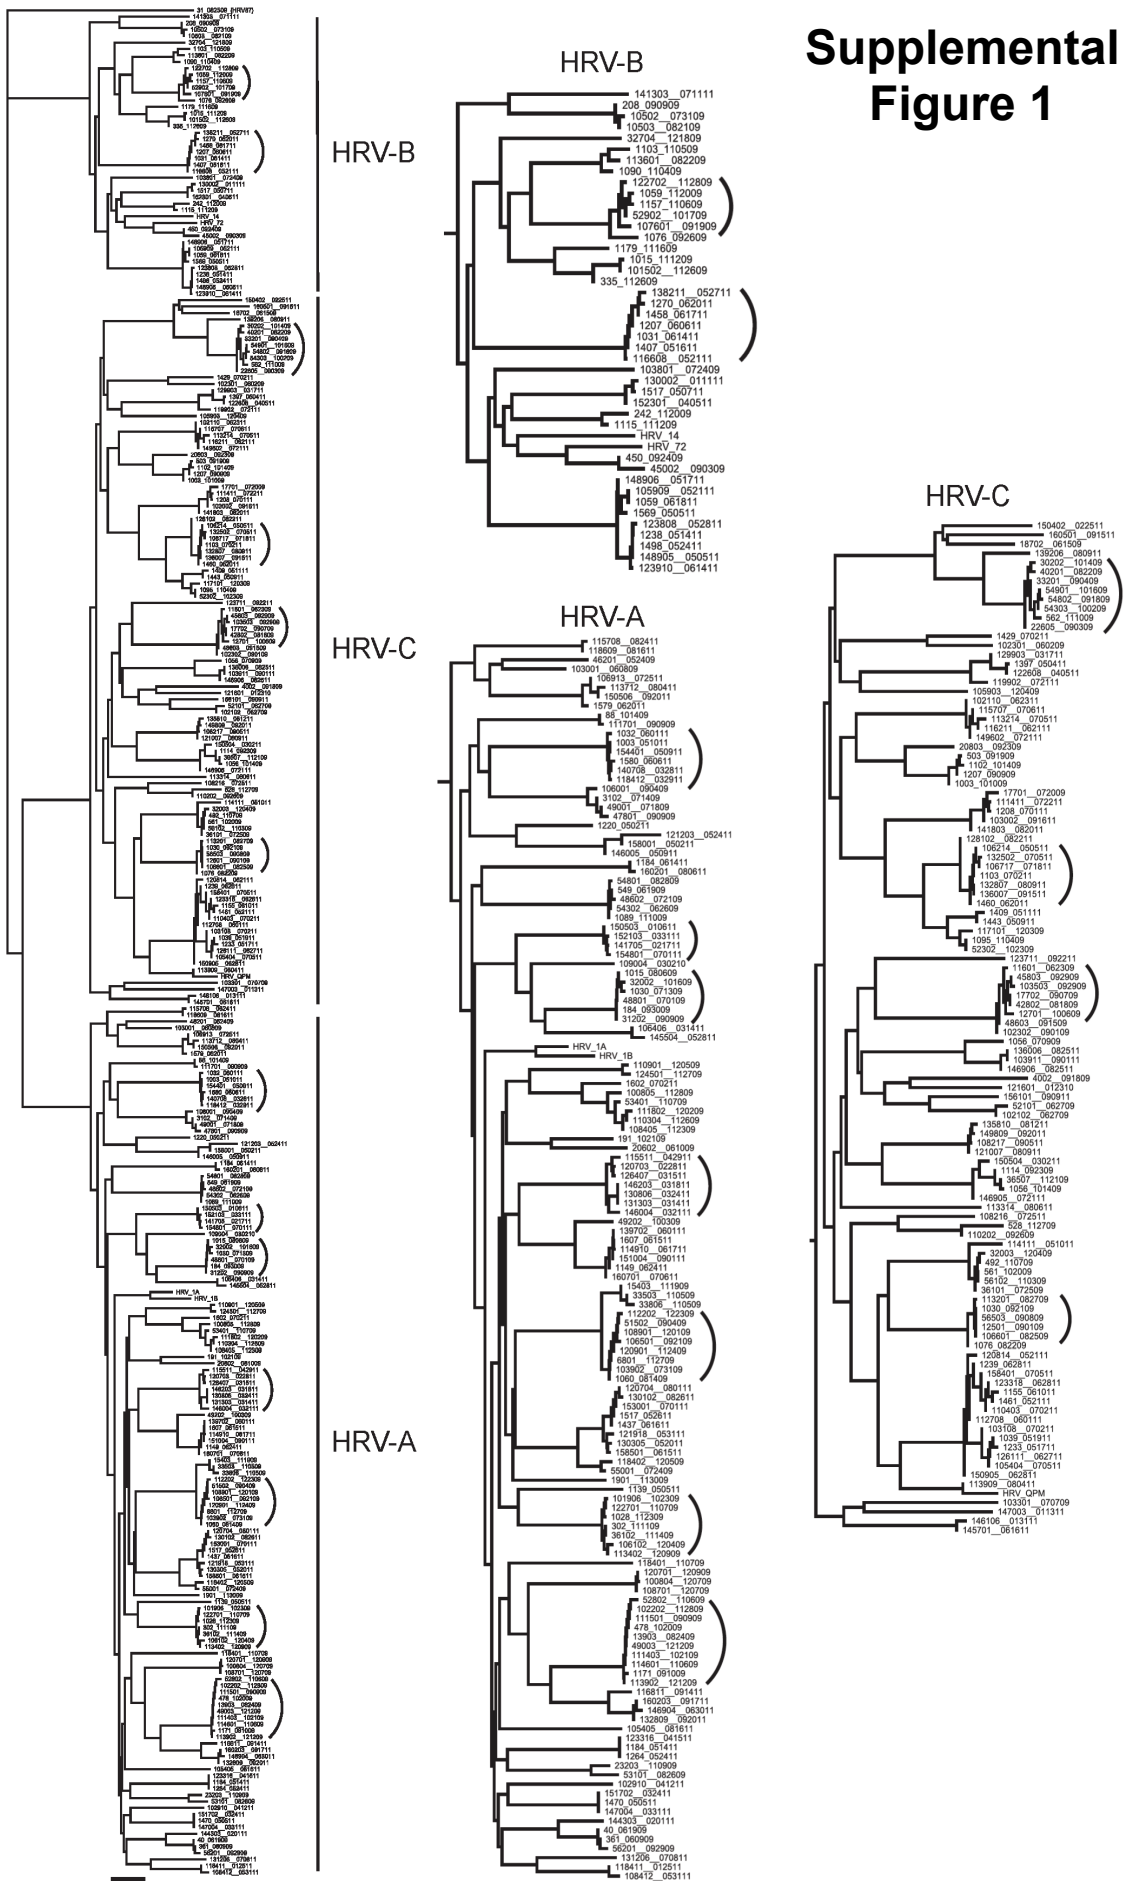

**Supplemental Figure 1.** Phylogenetic tree depicting relationships between known HRV genotypes and HRV sequences from this study. Previously known HRV serotypes are designated by HRV. Sequence names from this study include subject number (first set of digits) and date (last set of digits). Sequences were aligned and tree generated using neighbor-joining algorithm with HRV87 as an outgroup to root the tree. The entire tree is shown on the left with species HRV-A, -B, and -C indicated. Subtrees for each species are shown on the right. Arcs indicate clusters of identical or nearly identical sequences. Scale bar indicates nucleotide substitutions/site.
